# Supplementary material
Source: PubMed Central journal article supplement (PMC5675963)
Supplement: cmi20178x4.pdf [file cmi20178x4.pdf]

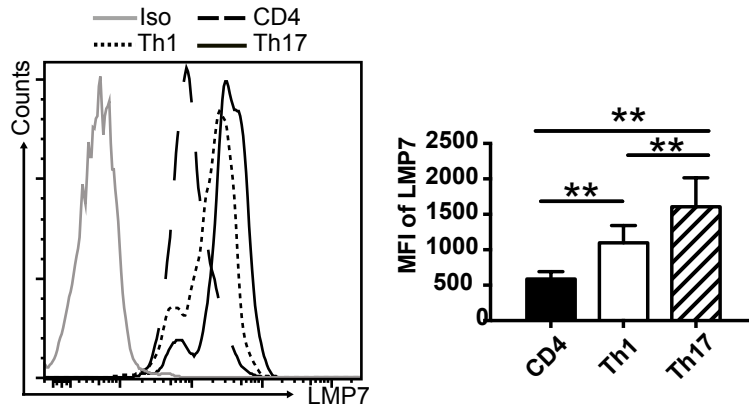

Additional Fig. 2 Th17 cells in chromatin induced lupus mice express high levels of LMP7. The expression levels of LMP7 in CD4 T cells, Th1 cells and Th17 cells in spleen of chromatin induced lupus mice were examined by flow cytometry (n=3 per group, mean±SD, \*\*p<0.01).
