# Supplementary material
Source: PubMed Central journal article supplement (PMC5675963)

Hoechst

CD19

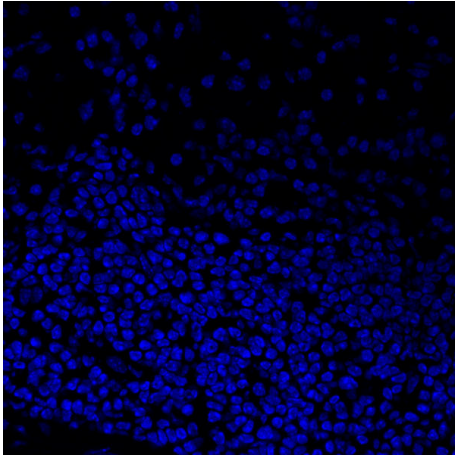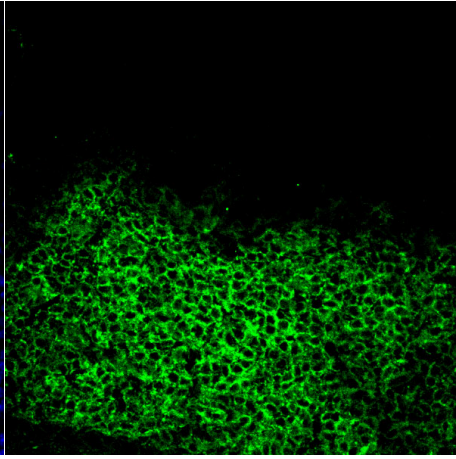

CD23

Merge

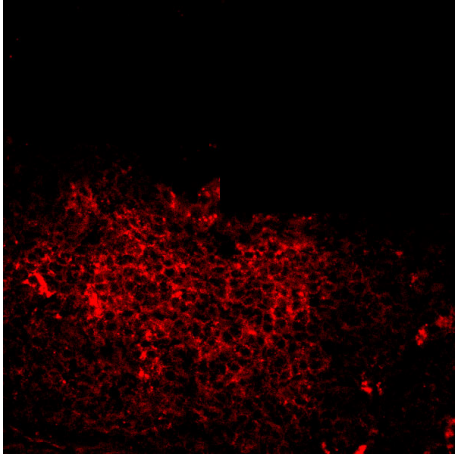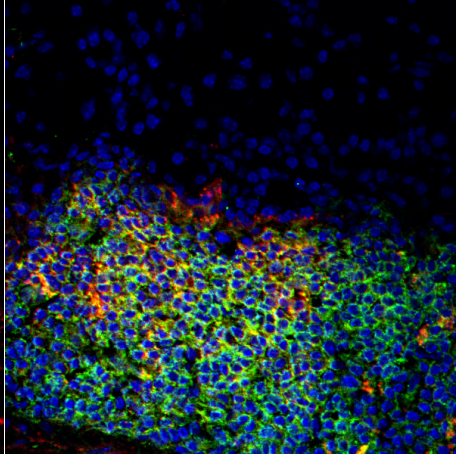

Supplement: cmi20178x1.pdf [file cmi20178x1.pdf]

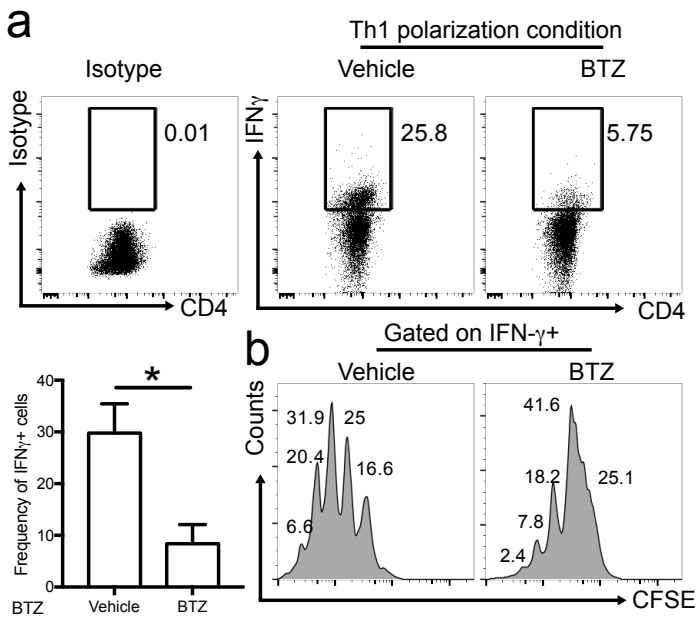

Supplement: cmi20178x2.pdf [file cmi20178x2.pdf]
